# Supplementary material for: Comparative transcriptome profiling of virulent and avirulent isolates of Neoparamoeba perurans
Source: Springer Nature journal article supplement (doi:10.1038/s41598-022-09806-5), 2022-04-07
Supplement: 41598_2022_9806_MOESM1_ESM.pdf [file 41598_2022_9806_MOESM1_ESM.pdf]

**Comparative transcriptome profiling of virulent and avirulent isolates  
of *Neoparamoeba perurans***

Aaron J. Smith\*, Philip B.B. Crosbie, Barbara F. Nowak, Andrew R. Bridle

Institute for Marine and Antarctic Studies, University of Tasmania, Launceston, Tasmania,  
Australia

\*Corresponding author

Email: [aj.smith@utas.edu.au](mailto:aj.smith@utas.edu.au)

**Supplementary table S1A.** Neoparamoeba perurans transcriptome assembly statistics

| <b>Trinity de novo assembly</b> |            |
|---------------------------------|------------|
| Trinity genes                   | 66,361     |
| Trinity transcripts             | 86,517     |
| Total assembled bases           | 68,135,905 |
| Percent GC                      | 47.07      |
| Contig N50                      | 1,155      |
| Contig E90 # transcripts        | 8,038      |
| Contig E90 N50                  | 1,307      |
| BUSCO % completeness            | 84.7       |

**Supplementary table S1B.** Raw data from RNAseq samples pre-filtering

| <b>Accession</b> | <b>Sample</b>  | <b>Total bases</b> | <b>Read count</b> | <b>GC (%)</b> | <b>Q20 (%)</b> | <b>Q30 (%)</b> |
|------------------|----------------|--------------------|-------------------|---------------|----------------|----------------|
| SRR17772868      | Clone4_-1_1    | 3,529,311,276      | 34,943,676        | 51            | 98.32          | 91.25          |
| SRR17772868      | Clone4_-1_2    | 3,529,311,276      | 34,943,676        | 51            | 97.62          | 92.50          |
| SRR17772867      | Clone4_-2_1    | 3,324,748,199      | 32,918,299        | 51            | 98.31          | 91.34          |
| SRR17772867      | Clone4_-2_2    | 3,324,748,199      | 32,918,299        | 51            | 97.73          | 92.73          |
| SRR17772866      | Clone4_-3_1    | 2,844,160,707      | 28,160,007        | 50            | 98.34          | 91.47          |
| SRR17772866      | Clone4_-3_2    | 2,844,160,707      | 28,160,007        | 50            | 97.54          | 92.53          |
| SRR17772865      | Wild_type_-1_1 | 3,249,881,242      | 32,177,042        | 52            | 98.44          | 91.74          |
| SRR17772865      | Wild_type_-1_2 | 3,249,881,242      | 32,177,042        | 51            | 97.85          | 92.97          |
| SRR17772864      | Wild_type_-2_1 | 3,039,286,647      | 30,091,947        | 51            | 98.36          | 91.61          |
| SRR17772864      | Wild_type_-2_2 | 3,039,286,647      | 30,091,947        | 51            | 97.80          | 92.88          |
| SRR17772863      | Wild_type_-3_1 | 3,327,365,008      | 32,944,208        | 52            | 98.43          | 91.75          |
| SRR17772863      | Wild_type_-3_2 | 3,327,365,008      | 32,944,208        | 52            | 97.74          | 92.96          |

\*\_1 or \_2 (e.g., Clone4\_-1\_1) denotes paired end read direction; Clone4 = avirulent, Wild type = virulent

**Supplementary table S1C.** Filtered RNAseq (processed) data used in transcriptome assembly

| <b>Sample</b>  | <b>Total bases</b> | <b>Read count</b> | <b>% reads survived</b> |               |                |                |
|----------------|--------------------|-------------------|-------------------------|---------------|----------------|----------------|
|                |                    |                   | <b>filter</b>           | <b>GC (%)</b> | <b>Q20 (%)</b> | <b>Q30 (%)</b> |
| Clone4_-1_1    | 3,387,385,926      | 34,555,846        | 95.98                   | 51            | 99.9996        | 95.27          |
| Clone4_-1_2    | 3,390,876,706      | 34,555,846        | 96.08                   | 51            | 99.9876        | 95.50          |
| Clone4_-2_1    | 3,190,351,919      | 32,563,010        | 95.96                   | 51            | 99.9993        | 95.34          |
| Clone4_-2_2    | 3,194,901,215      | 32,563,010        | 96.09                   | 51            | 99.9894        | 95.66          |
| Clone4_-3_1    | 2,728,859,007      | 27,812,188        | 95.95                   | 50            | 99.9996        | 95.41          |
| Clone4_-3_2    | 2,731,259,875      | 27,812,188        | 96.03                   | 50            | 99.9884        | 95.58          |
| Wild_type_-1_1 | 3,147,618,307      | 31,944,618        | 96.85                   | 52            | 99.9998        | 95.46          |
| Wild_type_-1_2 | 3,152,098,791      | 31,944,618        | 96.99                   | 52            | 99.9908        | 95.67          |
| Wild_type_-2_1 | 2,916,491,423      | 29,783,253        | 95.96                   | 51            | 99.9996        | 95.45          |
| Wild_type_-2_2 | 2,920,145,637      | 29,783,253        | 96.08                   | 51            | 99.9911        | 95.71          |
| Wild_type_-3_1 | 3,216,134,710      | 32,652,595        | 96.66                   | 52            | 99.9997        | 95.43          |
| Wild_type_-3_2 | 3,221,713,707      | 32,652,595        | 96.82                   | 52            | 99.9901        | 95.76          |

\*\_1 or \_2 (e.g., Clone4\_-1\_1) denotes paired end read direction; Clone4 = avirulent, Wild type = virulent
